# Supplementary material for: Targeting Human Osteoarthritic Chondrocytes with Ligand Directed Bacteriophage-Based Particles
Source: MDPI journal article supplement (doi:10.3390/v13122343), 2021-11-23
Supplement: s1 [file s1]

## Supplementary Materials

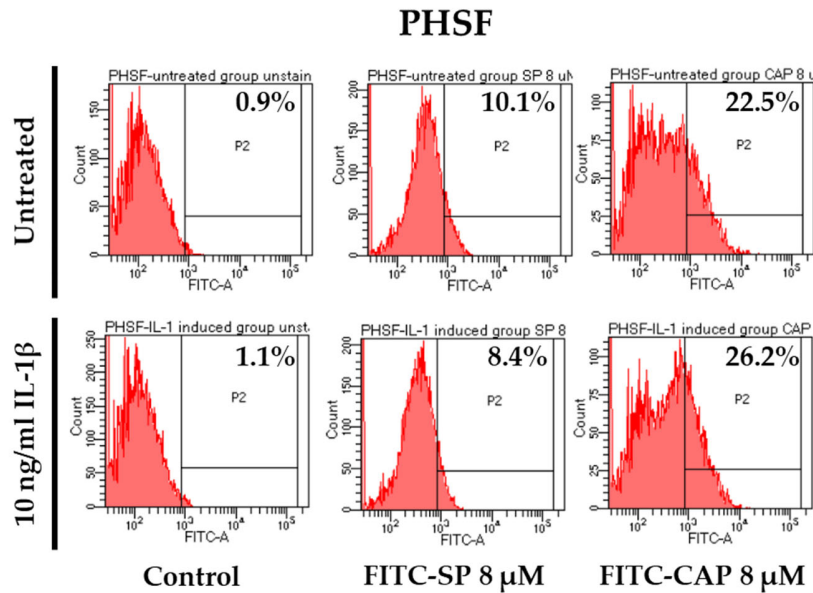

**Figure S1.** Flow cytometric analysis of FITC positive PHSF cells. IL-1 $\beta$  treated PHSF were incubated with CAP-FITC or SP-FITC at 8 $\mu$ M for 4.5 hours at 37°C. The cells were washed and FITC positive cells were analyzed by flow cytometry.

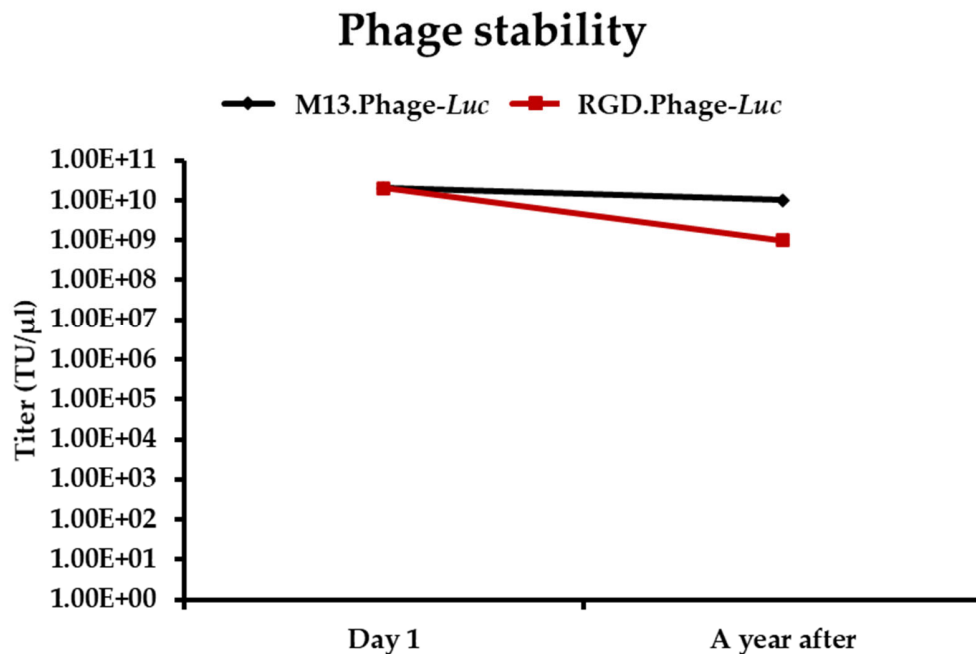

**Figure S2.** Phage stability was estimated using bacterial infection method. RGD.Phage-Luc and M13.Phage-Luc titers were quantified and the phage solutions were kept at 4°C for approximately 1 year. The phage solutions were then titrated again with the same bacterial infection method.

**Table S1.** Primer sequences used for cloning and real-time qPCR experiments.

| Gene<br>(human) | Primers (5'→3')                                           |
|-----------------|-----------------------------------------------------------|
| <i>CAP-pIII</i> | Forward:<br>CGCCCGAGCGCGGGAGGAGGAAGCGAAACTGTTGAAAGTTGTTT  |
|                 | Reverse:<br>CGGCGGAATAATCACGCGCCAATCAGCGGAGTGAGAATAGAAAGG |
| <i>ITR</i>      | Forward: GGAACCCCTAGTGATGGAGTT                            |
|                 | Reverse: CGGCCTCAGTGAGCGA                                 |
| <i>MMP-1</i>    | Forward: ATGAAGCAGCCCAGATGTGGAG                           |
|                 | Reverse: TGGTCCACATCTGCTCTTGGA                            |
| <i>MMP-3</i>    | Forward: AGCAAGGACCTCGTTTTCATT                            |
|                 | Reverse: GTCAATCCCTGGAAAGTCTTCA                           |
| <i>MMP-13</i>   | Forward: TTGTTGCTGCGCATGAGTTCG                            |
|                 | Reverse: GGGTGCTCATATGCAGCATCA                            |
| <i>COL2A1</i>   | Forward: AATTCCTGGAGCCAAAGGAT                             |
|                 | Reverse: AGGACCAGTTGCACCTTGAG                             |
| <i>ACAN</i>     | Forward: AGGCAGCGTGATCCTTACC                              |
|                 | Reverse: GGCCTCTCCAGTCTCATTCTC                            |
| <i>GAPDH</i>    | Forward: CCCCTTCATTGACCTCAACTAC                           |
|                 | Reverse: GATGACAAGCTTCCCGTTCTC                            |

**Table S2.** HACs donors' information

| Code name | Gender | Age | Indication                   |
|-----------|--------|-----|------------------------------|
| HACs M11  | Male   | 11  | Osteosarcoma                 |
| HACs G13  | Female | 13  | Osteosarcoma                 |
| HACs G18  | Female | 18  | Osteosarcoma                 |
| HACs M27  | Male   | 27  | Chondrosarcoma at pelvis Lt. |
| HACs M54  | Male   | 54  | No information               |

**Table S3.** The titration result of CAP.Phage and M13.Phage

| Method                               | Name                  | Titer                 |
|--------------------------------------|-----------------------|-----------------------|
| qPCR<br>(genome copies/ $\mu$ l)     | M13.Phage- <i>Luc</i> | $2.58 \times 10^{11}$ |
|                                      | CAP.Phage- <i>Luc</i> | $2.61 \times 10^{11}$ |
| Bacterial titration<br>(TU/ $\mu$ l) | M13.Phage- <i>Luc</i> | $3 \times 10^{11}$    |
|                                      | CAP.Phage- <i>Luc</i> | $1 \times 10^{11}$    |
